# Supplementary material for: pH-Triggered copolymer micelles as drug nanocarriers for intracellular delivery
Source: Royal Society of Chemistry journal article supplement (doi:10.1039/c6ra00673f), 2016-01-01
Supplement: c6ra00673f1.pdf [file c6ra00673f1.pdf]

## Supporting Information

# pH-triggered Copolymer Micelles as Drug Nanocarrier for Intracellular Delivery

Weiju Hao<sup>a</sup>, Danyang Liu<sup>a</sup>, Yazhuo Shang<sup>a</sup>, Junqi Zhang<sup>b\*</sup>, Shouhong Xu<sup>a\*</sup>, Honglai Liu<sup>a</sup>

<sup>a</sup>Key Laboratory for Advanced Materials and Department of Chemistry,

East China University of Science and Technology, 130 Meilong Rd, Shanghai, 200237

<sup>b</sup>Key Laboratory of Medical Molecular Virology (Ministry of Health and Ministry of Education), Department of

Medical Microbiology and Parasitology, School of Basic Medical Sciences, Fudan University,

138Yixueyuan Rd, Shanghai 200032, PR China.

1:

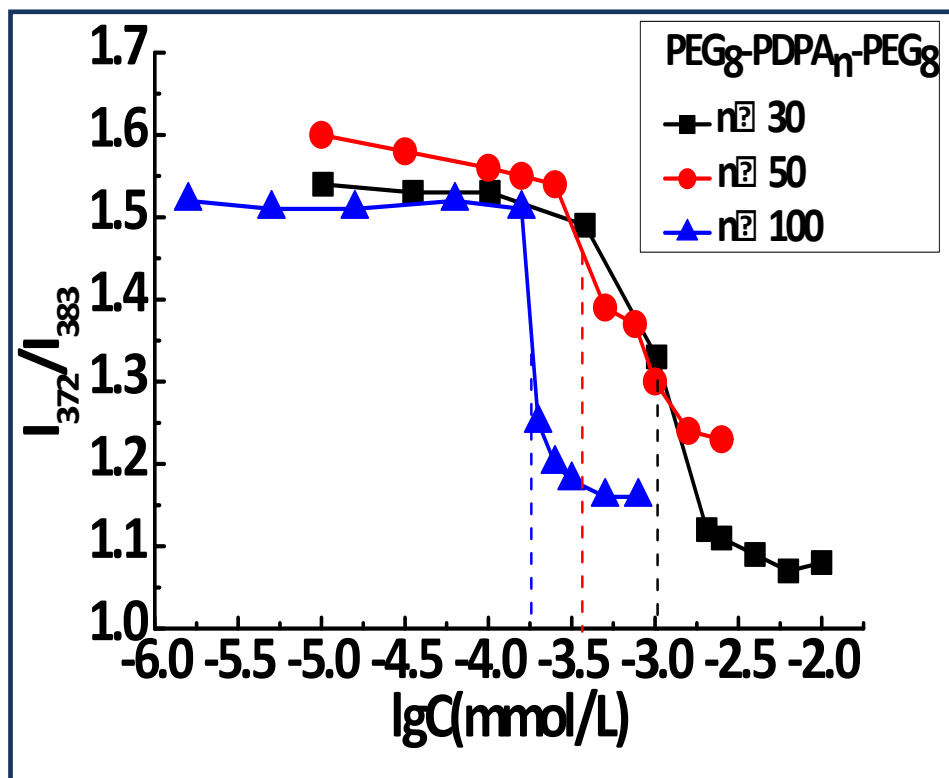

S1: The fluorescence intensity ratio ( $I_{372}/I_{383}$ ) versus logarithm of critical micelles concentrations (PEG<sub>8</sub>-PDPA<sub>30</sub>-PEG<sub>8</sub>, PEG<sub>8</sub>-PDPA<sub>50</sub>-PEG<sub>8</sub> and PEG<sub>8</sub>-PDPA<sub>100</sub>-PEG<sub>8</sub>).
